# Supplementary material for: Amide I vibrational mode suppression in surface (SERS) and tip (TERS) enhanced Raman spectra of protein specimens
Source: Royal Society of Chemistry journal article supplement (doi:10.1039/c2an36478f), 2013-01-01
Supplement: c2an36478f.pdf [file c2an36478f.pdf]

## Amide I vibrational mode suppression in surface (SERS) and tip (TERS) enhanced Raman spectra of protein specimens

Dmitry Kurouski,<sup>a</sup> Thomas Postiglione,<sup>a</sup> Tanja Deckert-Gaudig,<sup>b</sup> Volker Deckert<sup>b,c</sup> and Igor K. Lednev<sup>b\*</sup>

Supporting Information

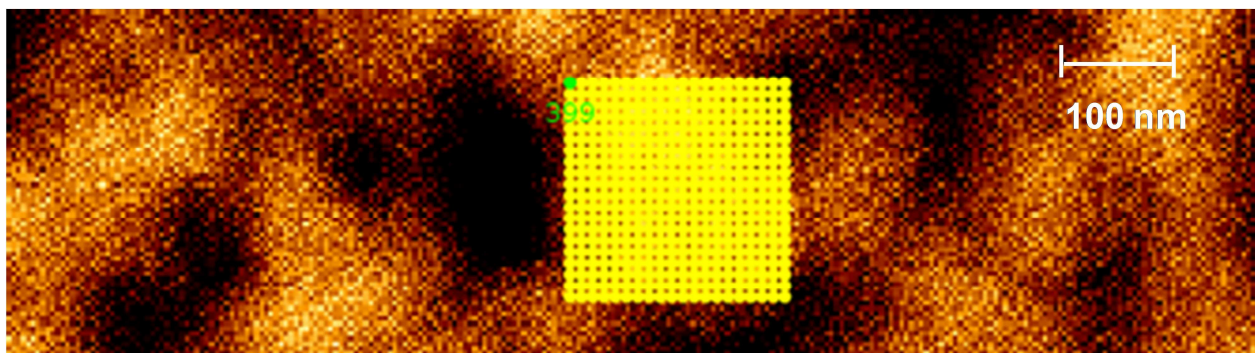

Fig. S1. AFM image of insulin protein deposition on the glass slide and spots of TERS spectra acquisition (yellow dots).

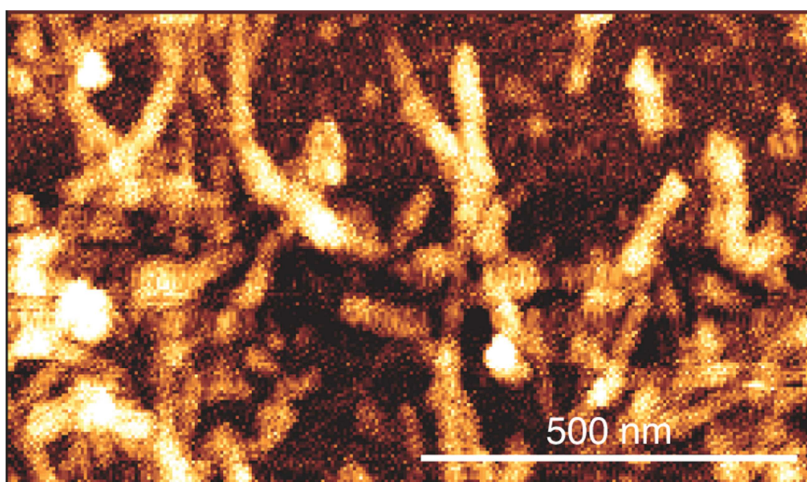

Fig. S2. AFM image of insulin fibril topology.

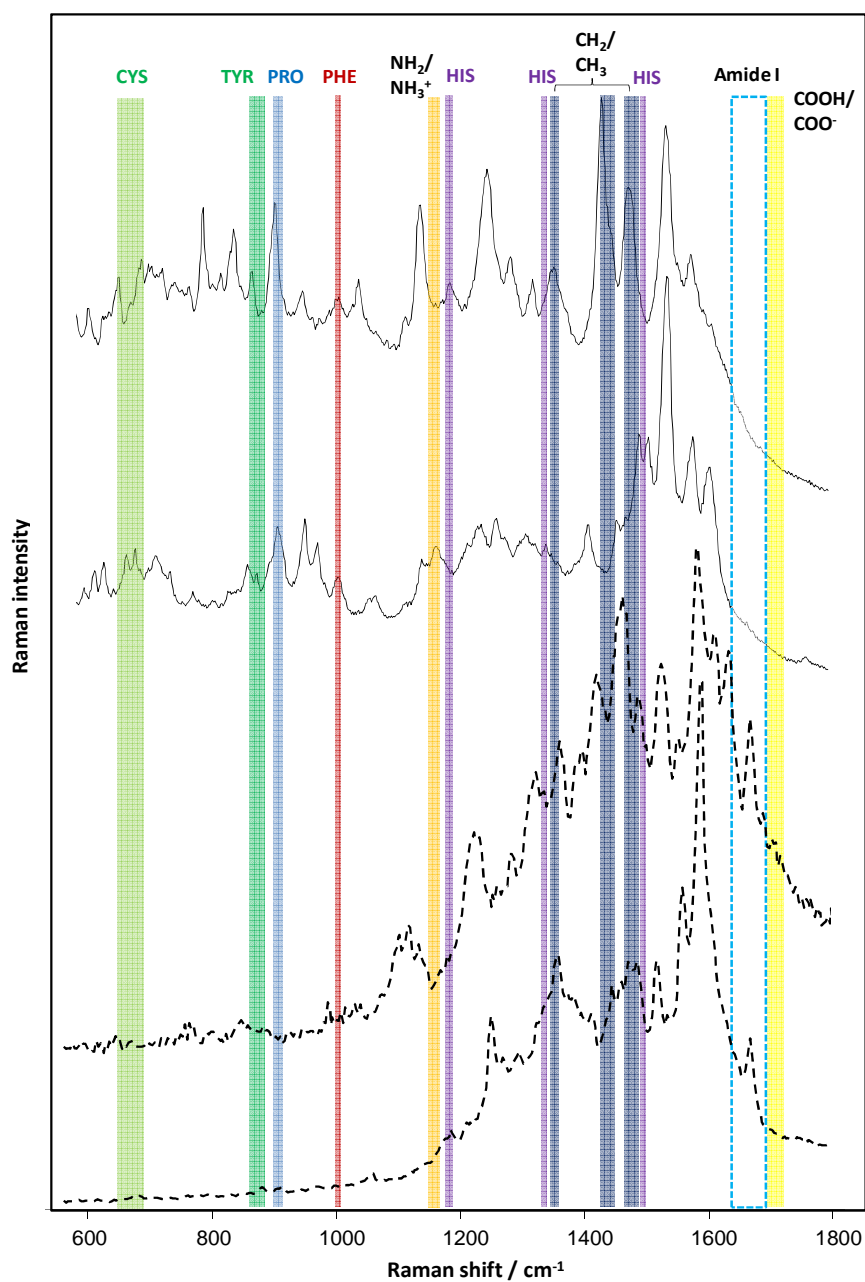

Fig. S3. Selected SERS spectra of insulin fibrils with suppressed amide I bands (—) and with evident amide I bands (---). For SERS, a solution of insulin fibrils was mixed with gold nano-particles and excitation laser light with  $\lambda = 785 \text{ nm}$  was used.

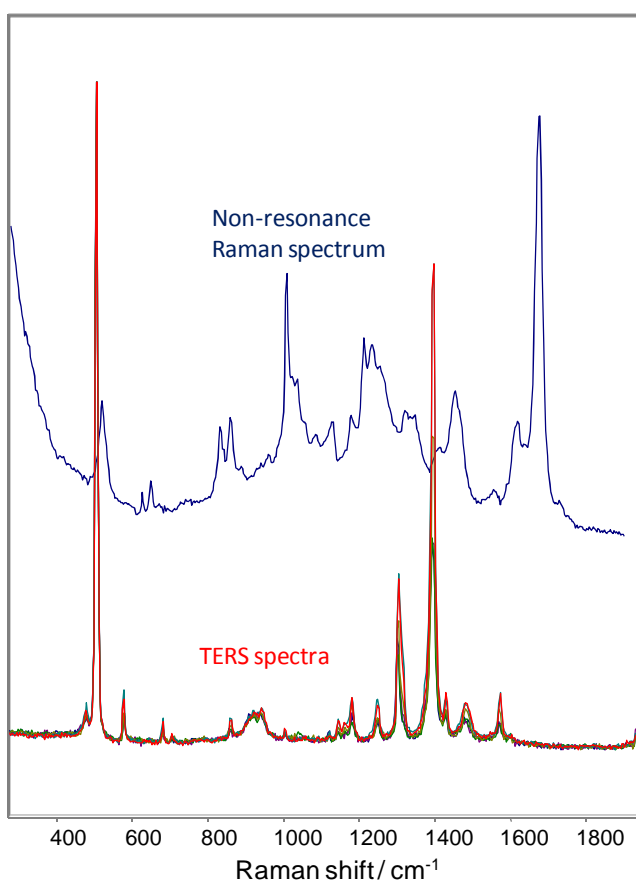

Fig. S4. TERS spectra (bottom) and normal Raman spectrum (blue, top) collected from insulin protein. Laser excitation wavelength is 532 nm.
